# Supplementary material
Source: PubMed Central journal article supplement (PMC7962598)
Supplement: NIHMS1646908-supplement-1.pdf [file NIHMS1646908-supplement-1.pdf]

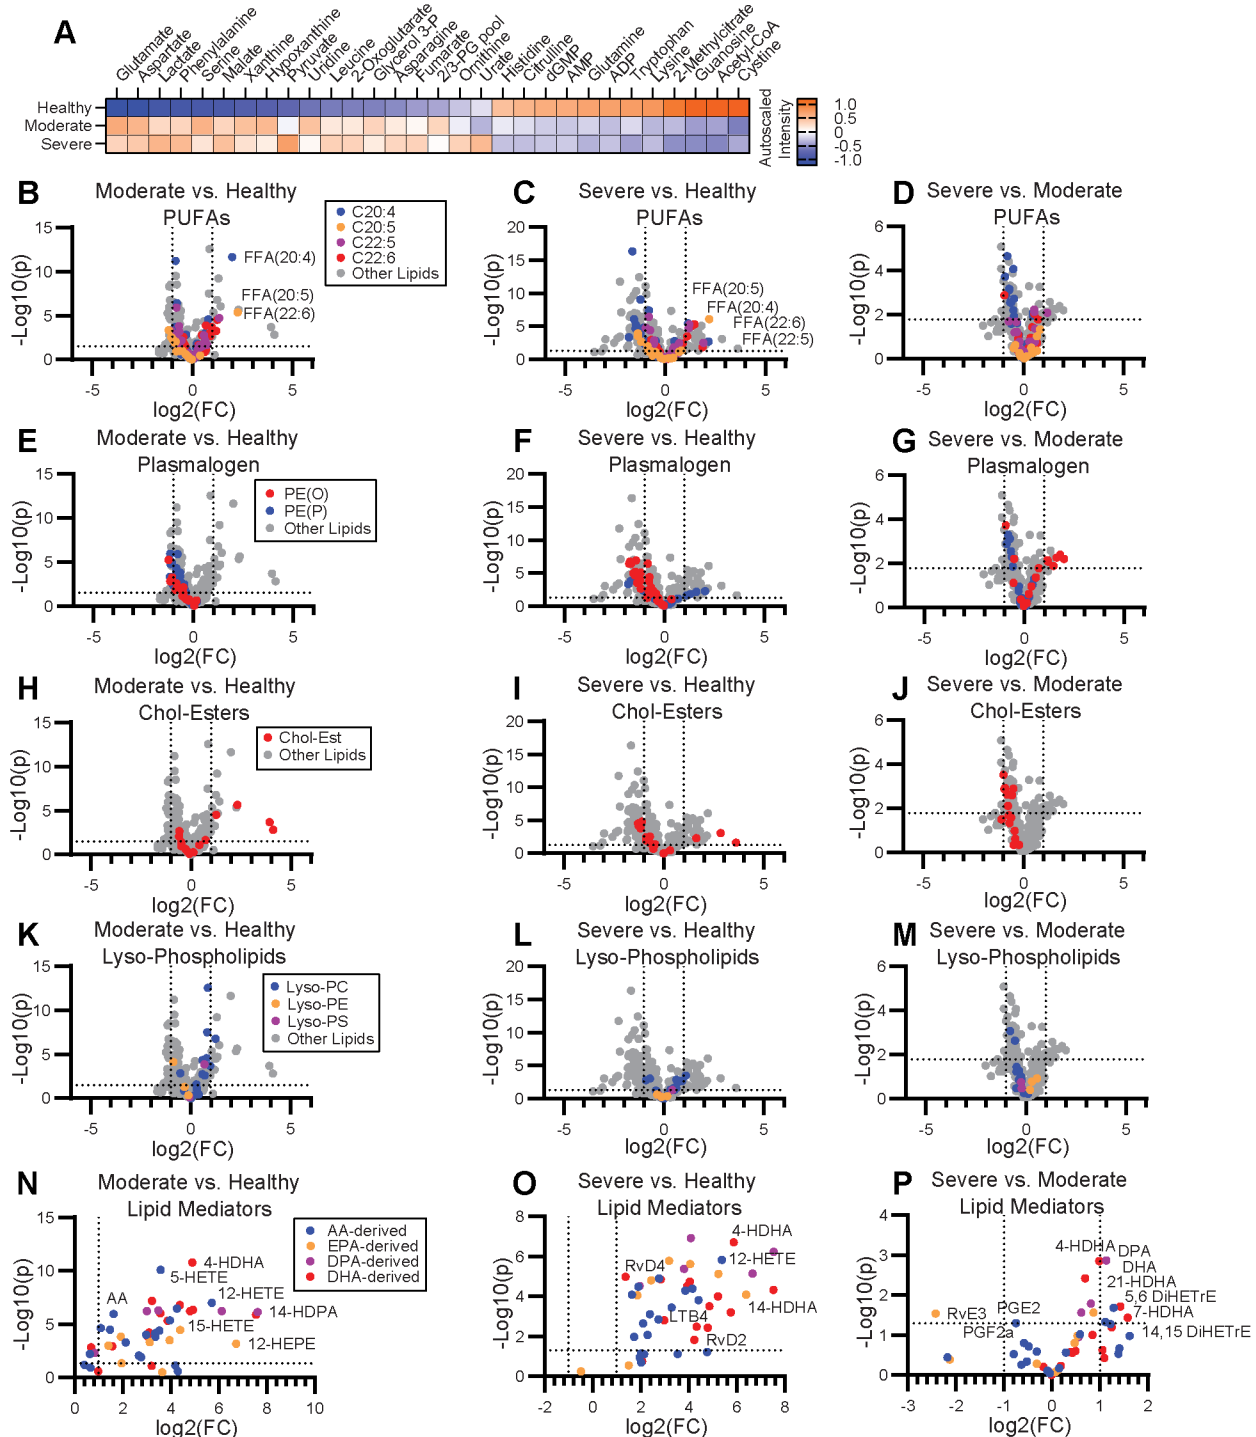

**Supplemental Figure 1. Changes in COVID-19 patient serum polar metabolites and lipid classes.** (A) Autoscaled mean of each group for significantly varied polar molecules between disease vs. healthy or severe vs. moderate comparison. (B-M) Combined lipidomic datasets comparing moderate to healthy, severe to healthy or severe to moderate via unpaired t-test. PUFA-containing lipids (B-D), PE-plasmalogen (E-G), cholesterol esters (H-J), lyso-phospholipids (K-M) are overlaid. Horizontal dotted lines represent the p-value cutoff for an FDR of 10 % (moderate vs. healthy: 0.050, severe vs. healthy: 0.032, severe vs. moderate: 0.017). Vertical dotted lines reflect a positive or negative 2-fold change in signal. (N-P) Volcanos plots of the LM dataset with lipid species colored by their parent PUFA.

**Supplemental Table 1. Patient demographics, preexisting conditions and treatment distributions.**

Patient data were compared using the chi-square test or Fisher's exact test for categorical variables and one-way analysis of variance (ANOVA) or unpaired t test was used for continuous variables. \*, Fisher's exact test between moderate and severe patients (no significant differences between these groups in all demographic categories).

|                                      | Healthy<br>(n=19)       | Moderate<br>(n=18)            | Severe<br>(n=20)           | p-value        |
|--------------------------------------|-------------------------|-------------------------------|----------------------------|----------------|
| <b>Demographics</b>                  |                         |                               |                            |                |
| <b>Mean Age ± SD<br/>(Range)</b>     | 42.7 ± 14.92<br>(21-72) | 60.56 ± 14.11<br>(26-92)      | 63.6 ± 15.17<br>(32-91)    | <0.001/0.8045* |
| <b>Mean BMI ± SD<br/>(Range)</b>     |                         | 29.65 ± 8.37<br>(19.49-55.04) | 31.08 ± 5.84<br>(22.87-44) | 0.5402         |
| <b>Gender, n (%)</b>                 |                         |                               |                            | 0.6391         |
| Male                                 | 9 (47.37%)              | 11 (61.11%)                   | 12 (60%)                   |                |
| Female                               | 10 (52.63%)             | 7 (38.89%)                    | 8 (40%)                    |                |
| <b>Race, n (%)</b>                   |                         |                               |                            | 0.8932         |
| White                                | 15 (78.95%)             | 13 (72.22%)                   | 14 (70%)                   |                |
| Black                                | 2 (10.53%)              | 2 (11.11%)                    | 3 (15%)                    |                |
| Hispanic                             | 1 (5.26%)               | 2 (11.11%)                    | 3 (15%)                    |                |
| Asian                                | 1 (5.26%)               | 1 (5.56%)                     | 0 (0%)                     |                |
| <b>Comorbidities</b>                 |                         |                               |                            |                |
| Heart disease                        |                         | 5 (27.78%)                    | 10 (50%)                   | 0.1983         |
| Hyperlipidemia                       |                         | 4 (22.22%)                    | 6 (30%)                    | 0.719          |
| Hypertension                         |                         | 10 (55.56%)                   | 15 (75%)                   | 0.3071         |
| Chronic lung diseases                |                         | 1 (5.56%)                     | 4 (20%)                    | 0.3436         |
| Diabetes                             |                         | 5 (27.78%)                    | 7 (35%)                    | 0.7342         |
| <b>Therapies</b>                     |                         |                               |                            |                |
| Tocilizumab                          |                         | 9 (50%)                       | 18 (90%)                   | 0.0113         |
| Hydroxychloroquine                   |                         | 13 (72.22%)                   | 20 (100%)                  | 0.0171         |
| Steroids                             |                         | 2 (11.11%)                    | 8 (40%)                    | 0.0673         |
| <b>Antiviral</b>                     |                         |                               |                            | 0.5292         |
| Azatanavir                           |                         | 11 (61.11%)                   | 13 (65%)                   |                |
| Remdesivir trial                     |                         | 2 (11.11%)                    | 4 (20%)                    |                |
| <b>Mechanical ventilation</b>        |                         | 0 (0%)                        | 13 (65%)                   | <0.0001        |
| <b>Intensive Care Unit</b>           |                         | 0 (0%)                        | 20 (100%)                  | <0.0001        |
| <b>Admission to draw date (days)</b> |                         | 3 ± 1                         | 4 ± 2                      | 0.0435         |
